# Supplementary material for: Modalités du traitement de l'information dans les conduites de jugement et de décision en contexte incertain
Source: MDPI journal article supplement (doi:10.3390/bios11070235), 1991-01-01
Supplement: s1 [file s1]

## **Supporting Information**

### **The ICP-MS conditions of Cu detection**

The pig samples were prepared for analysis of Cu concentration including wet tissue weighing 0.20 g liver, pork and serum samples into digestion tubes, respectively. Then add appropriate 3 mL nitric acid at 120°C, digest for 40 minutes, then add 1.2 mL hydrogen peroxide for continuing digest of 40 minutes. After the digestion and transfer samples to beakers and dilute with water to a final volume of 30 mL.

### **Recovery test**

The preprocess followed the pretreatment method in 2.3, and the analysis method is shown in 2.4.

**Table S1.** Copper concentration in various samples of pig from two copper source feeding groups at three dosage (Mean±SD, n=3).

| Tribasic Copper Chloride        |               |           |               |           |               |            | Copper Sulfate |           |               |            |               |            |
|---------------------------------|---------------|-----------|---------------|-----------|---------------|------------|----------------|-----------|---------------|------------|---------------|------------|
|                                 | Sample number | Con.      | Sample number | Con.      | Sample number | Con.       | Sample number  | Con.      | Sample number | Con.       | Sample number | Con.       |
| Copper level in fod-der (mg/kg) |               | 60        |               | 110       |               | 210        |                | 60        |               | 110        |               | 210        |
| Serum (mg/kg)                   | S1            | 1.53±0.05 | S7            | 2.04±0.23 | S13           | 1.90±0.29  | S19            | 0.98±0.15 | S25           | 1.27±0.17  | S31           | 1.36±0.06  |
|                                 | S2            | 1.45±0.19 | S8            | 2.14±0.20 | S14           | 2.38±0.19  | S20            | 0.92±0.10 | S26           | 1.33±0.14  | S32           | 1.69±0.23  |
|                                 | S3            | 2.03±0.12 | S9            | 2.12±0.19 | S15           | 1.76±0.15  | S21            | 1.30±0.11 | S27           | 1.32±0.24  | S33           | 1.25±0.12  |
|                                 | S4            | 1.72±0.27 | S10           | 1.40±0.18 | S16           | 2.03±0.11  | S22            | 1.10±0.14 | S28           | 0.87±0.17  | S34           | 1.42±0.29  |
|                                 | S5            | 1.90±0.16 | S11           | 2.27±0.33 | S17           | 1.62±0.20  | S23            | 1.20±0.20 | S29           | 1.40±0.11  | S35           | 1.15±0.14  |
|                                 | S6            | 1.42±0.21 | S12           | 1.64±0.14 | S18           | 2.18±0.43  | S24            | 0.90±0.10 | S30           | 1.02±0.10  | S36           | 1.56±0.08  |
| Muscle (mg/kg)                  | M1            | 0.59±0.09 | M7            | 0.48±0.06 | M13           | 1.03±0.13  | M19            | 0.75±0.14 | M25           | 0.56±0.06  | M31           | 0.81±0.09  |
|                                 | M2            | 0.64±0.06 | M8            | 0.53±0.04 | M14           | 0.94±0.05  | M20            | 0.81±0.07 | M26           | 0.63±0.08  | M32           | 0.74±0.08  |
|                                 | M3            | 0.39±0.04 | M9            | 0.83±0.08 | M15           | 0.92±0.09  | M21            | 0.49±0.04 | M27           | 0.99±0.12  | M33           | 0.72±0.68  |
|                                 | M4            | 0.53±0.06 | M10           | 0.66±0.08 | M16           | 1.23±0.12  | M22            | 0.67±0.08 | M28           | 0.79±0.03  | M34           | 0.97±0.12  |
|                                 | M5            | 0.56±0.09 | M11           | 0.33±0.04 | M17           | 0.54±0.07  | M23            | 0.71±0.10 | M29           | 0.39±0.07  | M35           | 0.42±0.04  |
|                                 | M6            | 0.43±0.05 | M12           | 0.57±0.08 | M18           | 0.88±0.12  | M24            | 0.55±0.07 | M30           | 0.68±0.08  | M36           | 0.69±0.05  |
| Liver (mg/kg)                   | L1            | 3.43±0.52 | L7            | 6.20±0.38 | L13           | 19.95±2.02 | L19            | 5.07±0.44 | L25           | 7.95±0.79  | L31           | 33.46±3.63 |
|                                 | L2            | 4.41±0.33 | L8            | 5.58±0.39 | L14           | 21.76±1.27 | L20            | 6.13±0.75 | L26           | 9.59±0.78  | L32           | 30.33±2.03 |
|                                 | L3            | 5.35±0.63 | L9            | 8.26±0.58 | L15           | 13.25±0.99 | L21            | 4.10±0.56 | L27           | 7.37±1.22  | L33           | 40.55±4.93 |
|                                 | L4            | 3.75±0.24 | L10           | 5.08±0.93 | L16           | 16.8±2.52  | L22            | 5.58±0.40 | L28           | 11.77±0.65 | L34           | 35.15±3.04 |
|                                 | L5            | 4.53±0.45 | L11           | 6.17±0.35 | L17           | 13.63±1.43 | L23            | 6.45±0.72 | L29           | 6.50±0.74  | L35           | 29.26±1.80 |
|                                 | L6            | 4.76±0.22 | L12           | 5.05±0.62 | L18           | 15.88±1.80 | L24            | 8.10±0.28 | L30           | 10.09±1.03 | L36           | 42.14±3.36 |

Con.: concentration.
